# Supplementary material for: <strong><b>Lack of Implementation of Pancasila Values in the Era of Globalization</b></strong>
Source: Preprints.org preprint supplement (doi:10.20944/preprints202106.0381.v1), 2021-06-14
Supplement: Supplementary file 1 [file supplementary]

# Nabila Vidi

# Paramestri\_FV\_2A\_ReVi\_A

*by Lily Collins*

---

**Submission date:** 10-Jun-2021 09:36PM (UTC-0400)

**Submission ID:** 1604393526

**File name:** Nabila\_Vidi\_Paramestri\_FV\_2A\_ReVi\_A.docx (24.44K)

**Word count:** 2668

**Character count:** 14880

## **Lack of Implementation of Pancasila Values in the Era of Globalization**

Nabila Vidi Paramestri<sup>1</sup>; Moses Glorino Rumambo Pandin<sup>2</sup>

Undergraduate Student at the Faculty of Psychology Universitas Airlangga<sup>1</sup>

Lecturer in the Undergraduate Program at the Faculty of Humanities, Universitas Airlangga<sup>2</sup>

### **Abstract**

Globalization plays a very important role in the advancement of science and technology today, especially in Indonesia. Globalization has also succeeded in changing all aspects of human life. In addition to having a positive impact on the development of science and technology in Indonesia, globalization also has a negative impact that is quite visible on the character of today's youth. The crisis of the character of Indonesian youth is a serious matter and is reflected in the behavior of Indonesian youth today which does not coincide with the identity of the Indonesian nation and the values of Pancasila. This paper examines the lack of implementation of Pancasila values in the life of the globalization era and also how globalization affects moral decadence among the younger generation. The method used is the *Literature Review* method, which is a qualitative research method by collecting data from the literature. The lack of practice of Pancasila values and the emergence of globalization is increasingly diminishing the character of Indonesian youth. The implementation of Pancasila values among teenagers needs to be increased so that the nation's moral character is not eroded by the currents of globalization.

**Keywords:** moral decadence, implementation of Pancasila, globalization

### **INTRODUCTION**

Pancasila is the basis and ideology of the nation. The entire life of Indonesian citizens must embody the values of Pancasila, and all the behavior of Indonesian citizens must be the implementation of the values of Pancasila. Not interpreting and living the values of Pancasila is the same as not appreciating the national heroes who fought for Pancasila. Indonesia has Pancasila as the state's view of life. The character of the Indonesian nation must be reflected in the values contained in the five precepts of Pancasila. However, nowadays, the character of Indonesian society, especially the younger generation of Indonesia, is gradually disappearing along with the birth of globalization. They don't care about values and morals anymore. They left their character that was based on Pancasila (2).

Indonesia's young generation is a hidden gem in the country. Indonesia's young generation has a lot of potential to uphold the Indonesian nation's name and lead the country to a bright future. To achieve successful growth for this country, the youthful generation must have great goals. These great aspirations cannot be isolated from the fact that they must have decent morality as the

nation's next generation. The prosperity of our country would undoubtedly be better if its citizens have decent values. On the other hand, if the youth's morals are poor and even depart from Pancasila's principles, the nation's growth would be impossible to attain effectively (5). The presence of a fighting spirit, as well as the unity of the younger generation's power in guarding the Indonesian nation's future so that the welfare and goals of the Indonesian people can be fulfilled, is the most important thing for the Indonesian nation's progress. Nothing is more powerful than the youth's dedication to the advancement of their own nation. The young generation holds the key to our country's future growth.

In addition to its positive impacts, the globalization era appears to have a negative impact on Indonesian youth. The degradation of Indonesian youth's moral values and character is a result of real globalization, and it requires attention from a variety of parties (2). This global era appears to allow freedom for the younger generation to act as they like, with little concern for whether or not what they are doing is a good or harmful thing. We may see this in the unusual activity that young people engage in, such as drug use, free sex, and so on (2). Young individuals who understand and behave in line with Pancasila are very few. Most of them just acknowledge and accept Pancasila as the state's foundation and philosophy, but they do not fully comprehend and interpret it, let alone apply its ideals in everyday life. Pancasila is no longer a way of life for the younger generation, and the values of Pancasila are now being allowed to fade away without any rescue or implementation attempts. Pancasila, which should be a way of life and a national concept, is now merely a slogan (2). The younger generation, who were supposed to be the Indonesian people's hope, has shown to be hopeless.

## **METHOD**

The method used is the *Literature Review* method or the library method. The library study method itself is a systematic scientific bibliographic research effort which in its stages includes collecting literature materials related to article writing, collection techniques using library methods, and organizing and presenting previously obtained data (3). The nature of this research is a descriptive analysis which is an understanding and explanation of the decomposition of the data that has been obtained.

## The Study Protocol

Works of literature that are used to create this article were obtained from the source Google Scholar within the year of publication 2019 to 2021.

## Search Strategy

The main keywords used to obtain the articles used were, "the young generation and Pancasila", "Pancasila implementation", and "Pancasila and globalization".

## Inclusion

The inclusion criteria of this article are journal articles with the theme of implementing Pancasila values among youth in the era of globalization, articles published from 2019 to 2021, articles written in Indonesian, having access to the full article text.

## RESEARCH RESULTS

The results of a *literature review* originating from the main source of Google Scholar and containing 10 journal articles in the period of publication from 2019 to 2021 are as follows.

| No. | Author of the Journal (Year) and Title of the                                            | Journal of the                                                                                                          | Study Results                                                                                                                                                                                                                                                        |
|-----|------------------------------------------------------------------------------------------|-------------------------------------------------------------------------------------------------------------------------|----------------------------------------------------------------------------------------------------------------------------------------------------------------------------------------------------------------------------------------------------------------------|
| 1.  | Setyaningsih (2019),<br>"DAMPAK<br>GLOBALISASI<br>TERHADAP<br>MORAL<br>GENERASI<br>MUDA" | Changes in the era of globalization are the main factor in the decline of the character and morals of Indonesian youth. | The decline and loss of the commendable character of Indonesian youth were caused by the entry of Western culture which then led to changes that tended to lead to a moral and moral crisis, causing a number of complex problems to hit this country due to morals. |
| 2.  | Budiarto G (2020),                                                                       | The moral character of Indonesian youth is already                                                                      | Many of today's youth are unconcerned about their morals.                                                                                                                                                                                                            |

|    |                                                                                                                                                                       |                                                                                                                                                                                                                                                 |                                                                                                                                                                                                                                                     |
|----|-----------------------------------------------------------------------------------------------------------------------------------------------------------------------|-------------------------------------------------------------------------------------------------------------------------------------------------------------------------------------------------------------------------------------------------|-----------------------------------------------------------------------------------------------------------------------------------------------------------------------------------------------------------------------------------------------------|
|    | "Indonesia dalam Pusaran Globalisasi dan Pengaruhnya Terhadap Krisis Moral dan Karakter"                                                                              | poor, but it now faces further deterioration as a result of globalization.                                                                                                                                                                      | By depending on trends, many of today's young generations have fallen into the black hole of globalization. In current age of globalization, the number of foreign cultural influences that are inconsistent with the Indonesian nation's identity. |
| 3. | Muttaqin Z, Wahyun (2019). Pemahaman dan Implementasi Ideologi Pancasila di Kalangan Generasi Muda                                                                    | The level of application of Pancasila values has also declined as a result of the younger generation's lack of understanding of Pancasila. The lack of implementation of Pancasila values influences the formation of deviant teenage behavior. | The practice of Pancasila values is decreasing over time. As in Sumi Village, there are only a few young individuals who live the Pancasila principles. The younger generation in Sumi Village has begun to abandon Pancasila's principles.         |
| 4. | Rahayu MS (2019). "Strategi Membangun Karakter Generasi Muda yang Beretika Pancasila dalam Kebhinekaan dalam Perspektif Keutuhan Negara Kesatuan Republik Indonesia." | The moral crisis in Indonesian youth comes because young people no longer practice Pancasila as a way of life.                                                                                                                                  | Parents and teenagers do not comprehend the significance of interpreting Pancasila's values, and they do not know concrete instances of behavior that represent Pancasila's values, thus parents do not set an example for their children.          |
| 5. | Lestari EY, Janah M, Wardanai PK (2019). Menumbuhkan Kesadaran Nasionalisme Generasi Muda di Era Globalisasi                                                          | To prepare for globalization, Pancasila education strengthens morals and ethics.                                                                                                                                                                | It is critical to instill a sense of patriotism in children from an early age. Pancasila implementation is critical to avoiding moral degradation as a threat posed by globalization.                                                               |



|    |                                                                                                                                       |                                                                                                                                                                  |                                                                                                                                                                                                                                                                                |
|----|---------------------------------------------------------------------------------------------------------------------------------------|------------------------------------------------------------------------------------------------------------------------------------------------------------------|--------------------------------------------------------------------------------------------------------------------------------------------------------------------------------------------------------------------------------------------------------------------------------|
|    | Melalui Penerapan Nilai-nilai Pancasila.                                                                                              |                                                                                                                                                                  |                                                                                                                                                                                                                                                                                |
| 6. | S. Dedi Hermawan (2019), "Dampak Globalisasi Terhadap Moralitas Remaja"                                                               | Due to the impact of other cultures, the conduct of the youthful generation in Indonesia has undergone substantial changes that tend to move in a bad direction. | Students at the Putra Bunda Tanjung Pura Private Vocational School were exposed to both negative and good influences, which influenced the nature of nationalism.                                                                                                              |
| 7. | Suwandi NP, Dewi DA (2021), "Implementasi Pancasila Untuk Membangun Karakter Generasi Muda."                                          | Increase efforts to adopt Pancasila ideals, grasp the values included in Pancasila, and use Pancasila as a reference while acting in life on a regular basis.    | The behavior of the young generation is a determinant of the nation's future; so, the younger generation must represent the values enshrined in Pancasila. To instill a sense of patriotism and nationalism in the younger generation, it must be based on Pancasila's values. |
| 8. | Yulia L, Dewi DA (2021), <b>PENGAMALAN BUTIR PANCASILA: PERWUJUDAN IMPLEMENTASI PANCASILA SEBAGAI ETIKA DALAM HIDUP BERMASYARAKAT</b> | With the meanings and values included in Pancasila, which serve as guidance for constantly leading a social life based on the Pancasila principles' values.      | Pancasila, as the nation's way of life, always develops an intelligent society and the underlying values and norms reflected in Pancasila principles, allowing the nation's aspirations to be realized.                                                                        |
| 9. | Antari LPS, Liska LD (2020), <b>"IMPLEMENTASI NILAI NILAI PANCASILA DALAM PENGUATAN</b>                                               | The order of human existence in Indonesia must be based on the values stated in Pancasila.                                                                       | The existence of the Indonesian people necessitates the execution of the noble principles included in Pancasila in order for the norms and ethical standards included in Pancasila to really become an intrinsic part of and be                                                |

|    |                                                                                                                       |                                                                                                     |                                                                                                                                                                                                                                                                     |
|----|-----------------------------------------------------------------------------------------------------------------------|-----------------------------------------------------------------------------------------------------|---------------------------------------------------------------------------------------------------------------------------------------------------------------------------------------------------------------------------------------------------------------------|
|    | KARAKTER BANGSA."                                                                                                     |                                                                                                     | blended with the personality of every Indonesian human being.                                                                                                                                                                                                       |
| 10 | Anggraini D, Fathari F, Anggara JW, Ardi Al Amin MD (2020). "Pengamalan Nilai-Nilai Pancasila Bagi Generasi Milenial" | The younger generation, in particular, has begun to shift the living standards of Pancasila values. | Applying Pancasila in daily life and conduct, one of Pancasila's stances for the Indonesian people is as a national way of life. That is, it indicates that Pancasila's ideals function as a guide for regulating attitudes and behaviors that serve as guidelines. |

## DISCUSSION

The fourth paragraph of the preamble of UUD 1945, which was formally mandated by PPKI on August 18, 1945, lists Pancasila as the basis of the Republic of Indonesia's ideology. Pancasila's principles have become a culture in the lives of society, country, and state as an ideology and the basis of the nation. However, with the passing of time, the noble values of Pancasila have begun to be neglected by Indonesian people. Many aspects of people's life nowadays do not represent Pancasila's noble values (12). According to Notonagoro in the book (Sunoto, 1991: 50), Pancasila is the foundation of the state, which transforms into a way of life and a unifying instrument for the country. The values embodied in the five precepts are ideals that serve as guidelines for all Indonesians' national and state lives. In order for the Indonesian country and state to survive in the era of globalization, we must uphold Pancasila's values. This implies that the next generation of Indonesians may continue to live and practice them, preserving the essence of these noble values and making them the eternal life guide of the Indonesian nation (10).

Indonesia is currently facing a very serious moral crisis. In a global era where science and technology are increasingly sophisticated, the next generation should be careful in utilizing existing technology and knowledge. However, advances in science and technology are not used as a means for self-development and quality improvement, but instead serve as a forum for showing off, as well as for expressing hatred towards fellow human beings. Especially when it comes to using social media, Indonesia is now experiencing severe moral crisis. In an increasingly

sophisticated global era of technology, the next generation should be careful in utilizing the current existing technology and knowledge. Developments in science and technology are not used for self-development, but rather as a platform for boasting and expressing hatred against fellow humans, especially when it comes to the use of social media. The current state of social media users among young people is quite concerning. The state's founders fought for Pancasila, but the nation's successors, the younger generation, do not even practice the values. Pancasila has a significance as the nation's perspective on life, particularly Pancasila is the orientation and direction of life in thinking and behaving for the people of Indonesia. This is Pancasila as the nation's view of life, which always creates an intelligent society and the attachment of values, norms implied in Pancasila's principles, so that the nation's ideals can be realized (9). As a bulwark in the face of obstacles in the expanding era of globalization, implementing Pancasila values to students can be carried out in the appropriate moments in the era of globalization (10).

Efforts to realize a moral and ethical young Pancasila require community and government cooperation. Efforts from the government itself can come in the form of eliminating obscene and offensive language on television programs and shows. Furthermore, through raising knowledge about what Pancasila is and the necessity of living according to Pancasila's beliefs. The community's responsibility is to filter what is consumed, both on social media and among acquaintances. The cultivation of Pancasila values does not have to begin from large organizations and institutions. Planting and practicing the values of Pancasila can be done from the smallest units, such as families. Families need to know and set an example for the child about which behavior is based on Pancasila, so that later when the child is old enough and familiar with the outside world, the child can understand the good and bad of a behavior to be carried out and the child can then be careful in ingesting information.

## CONCLUSION

As the Indonesian nation's ideology and philosophy, Pancasila's five precepts need to be re-understood, especially by the younger generation. The young generation's lack of understanding of Pancasila illustrates the urgency of instilling Pancasila values in their daily lives in response to the threat of globalization, that is, the erosion of the moral character of Indonesian youth. The morals and character of the young generation at this time reflect that the younger generation prefers



behavior that is influenced by foreign cultures rather than behaving in accordance with the five precepts of Pancasila. Efforts to improve and increase the implementation of Pancasila values need to exist, no matter how small it is, in order to realize the moral and ethical youth of Pancasila.

## REFERENCES

1. Rahayu MS. *Strategi Membangun Karakter Generasi Muda yang Beretika Pancasila dalam Kebhinekaan dalam Perspektif Keutuhan Negara Kesatuan Republik Indonesia*. Jurnal Pendidikan. 2019 Nov;28(3):16.
2. Budiarto G. *Indonesia dalam Pusaran Globalisasi dan Pengaruhnya Terhadap Krisis Moral dan Karakter*. pamarator. 2020 Apr 4;13(1):50–6.
3. Danandjaja J. *Metode Kepustakaan*. Jurnal Antropologi Indonesia (1997). 2014;0(52).
4. Setyaningsih. DAMPAK GLOBALISASI TERHADAP MORAL GENERASI MUDA. Jurnal Agama Hindu. 2019;22(1):10.
5. Muttaqin Z, Wahyun. Pemahaman dan Implementasi Ideologi Pancasila di Kalangan Generasi Muda. Jurnal CIVICUS: Pendidikan-Penelitian-Pengabdian Pendidikan Pancasila dan Kewarganegaraan. 2019;7(2):9.
6. Lestari EY, Janah M, Wardanai PK. **MENUMBUHKAN KESADARAN NASIONALISME GENERASI MUDA DI ERA GLOBALISASI MELALUI PENERAPAN NILAI-NILAI PANCASILA**. 2019;1:8.
7. S, Dedi Hermawan. DAMPAK GLOBALISASI TERHADAP MORALITAS REMAJA ( STUDI SMK Swasta Putra Bunda Tanjung Pura) Tahun Pelajaran 2018/2019. JSPK. 2019 May 5;8(1):88–93.
8. Suwandi NP, Dewi DA. Implementasi Pancasila Untuk Membangun Karakter Generasi Muda. Antropocene [Internet]. 2021 Apr.30 [cited 2021 May 26];1(10). Available from: <https://journalactualinsight.com/index.php/antropocene/article/view/244>
9. Yulia L, Dewi DA. **PENGAMALAN BUTIR PANCASILA: PERWUJUDAN IMPLEMENTASI PANCASILA SEBAGAI ETIKA DALAM HIDUP BERMASYARAKAT**. Jurnal Kewargaan. 2021;5(1):11.
10. Antari LPS, Liska LD. **IMPLEMENTASI NILAI NILAI PANCASILA DALAM PENGUATAN KARAKTER BANGSA**. widyadari [Internet]. 2020 Oct.2 [cited 2021 May 26];21(2):676 - 687. Available from: <https://ojs.mahadewa.ac.id/index.php/widyadari/article/view/916>

11. Anggraini D, Fathari F, Anggara JW, Ardi Al Amin MD. Pengamalan Nilai-Nilai Pancasila Bagi Generasi Milenial. JISoP. 2020 Apr 2;2(1):11.
12. S. M. Samino, "Layanan Bimbingan Belajar," Surakarta: Fairuz Media, 2011.

## ORIGINALITY REPORT

10%

SIMILARITY INDEX

10%

INTERNET SOURCES

4%

PUBLICATIONS

1%

STUDENT PAPERS

## PRIMARY SOURCES

1

[journal.upy.ac.id](http://journal.upy.ac.id)

Internet Source

3%

2

[journal2.um.ac.id](http://journal2.um.ac.id)

Internet Source

1%

3

[journal.uny.ac.id](http://journal.uny.ac.id)

Internet Source

1%

4

[ojs.unm.ac.id](http://ojs.unm.ac.id)

Internet Source

1%

5

Submitted to President University

Student Paper

1%

6

[garuda.ristekbrin.go.id](http://garuda.ristekbrin.go.id)

Internet Source

1%

7

[www.kti.binsarhutabarat.com](http://www.kti.binsarhutabarat.com)

Internet Source

1%

8

[www.ejournal.stkipbudidaya.ac.id](http://www.ejournal.stkipbudidaya.ac.id)

Internet Source

1%

9

[ojs.mahadewa.ac.id](http://ojs.mahadewa.ac.id)

Internet Source

<1%

|    |                                                                                                 |      |
|----|-------------------------------------------------------------------------------------------------|------|
| 10 | <a href="http://www.researchgate.net">www.researchgate.net</a><br>Internet Source               | <1 % |
| 11 | <a href="http://jurnal.ensiklopediaku.org">jurnal.ensiklopediaku.org</a><br>Internet Source     | <1 % |
| 12 | <a href="http://www.kompasiana.com">www.kompasiana.com</a><br>Internet Source                   | <1 % |
| 13 | <a href="http://journal.univetbantara.ac.id">journal.univetbantara.ac.id</a><br>Internet Source | <1 % |
| 14 | <a href="http://jurnal.unpad.ac.id">jurnal.unpad.ac.id</a><br>Internet Source                   | <1 % |
| 15 | <a href="http://ejournal.radenintan.ac.id">ejournal.radenintan.ac.id</a><br>Internet Source     | <1 % |

Exclude quotes Off  
Exclude bibliography Off

Exclude matches Off
